# Supplementary material
Source: MDPI journal article supplement (https://www.mdpi.com/2073-4441/12/6/1840)
Supplement: s1 [file s1]

### Supplementary Materials – Equations

Correlation coefficient (S1), Root Mean Square Error (RMSE, S2), Nash – Sutcliffe coefficient (NSE, S3) and Kling-Gupta efficiency (KGE, S4)

$$r_{xy} = \frac{S_{xy}}{S_x S_y} \quad (S1)$$

where,  $r_{xy}$  is the sample correlation coefficient,  $S_{xy}$  is the sample covariance,  $S_x, S_y$  are the standard deviations from the measured and simulated values respectively.

$$RMSE = \sqrt{\frac{\sum_{i=1}^n (f_i - O_i)^2}{n}} \quad (S2)$$

where, RMSE is the Root mean square error,  $f_i$  is the simulated value,  $O_i$  is the measured value,  $n$  is the number of values.

$$NSE = 1 - \frac{\sum_{t=1}^T (O_t - P_t)^2}{\sum_{t=1}^T (P_t - \overline{O_t})^2} \quad (S3)$$

where, NSE is the Nash – Sutcliffe coefficient,  $O_t$  is the measured streamflow at  $t$  time,  $P_t$  is simulated streamflow at  $t$  time,  $\overline{O_t}$  is the average of measured streamflow.

$$KGE_s = 1 - ED_s \quad (S4)$$

$$ED_s = \sqrt{[S_r \cdot (r - 1)]^2 + [S_\alpha \cdot (\alpha - 1)]^2 + [S_\beta \cdot (\beta - 1)]^2}$$

$$\alpha = Sd_{mod} / Sd_{obs}$$

$$\beta = \mu_s / \mu_o$$

where,  $KGE$  is the Kling-Gupta efficiency,  $\beta$  is the ratio between the mean simulated and mean observed flows (bias),  $S_\alpha, S_\beta, S_r$  are scaling factors that can be used to re-scale the criteria before computing the ideal distance from the ideal point ( $ED = 1$ ),  $r$  is the correlation coefficient.
